# Supplementary material
Source: PubMed Central journal article supplement (PMC6029542)
Supplement: 2017_180919-Disclosures_and_Contributions.pdf [file 2017_180919-Disclosures_and_Contributions.pdf]

Haematologica  
HAEMATOL/2017/180919  
Version 4

Improved erythroid differentiation of multiple human pluripotent stem cell lines in microcarrier culture by modulation of Wnt/  $\beta$ -Catenin signaling

Jaichandran Sivalingam, Hong Yu Chen, Bin-Xia Yang, Zhong Ri Lim, Alan Tin Lun Lam, Tsung Liang Woo, Allen Kuan-Liang Chen, Shaul Reuveny, Yui-Han Loh, and Steve Kah-Weng Oh

Disclosures: Steve Oh is the founder of Brilliant Research Pte Ltd.

Contributions: Jaichandran - Planned and performed all experiments, acquisition of data and analysis of results and wrote manuscript. Hong Yu Chen, Yang Bin Xia, Alan Lam, Lim Zhong Ri, Woo Tsung Liang- Performed experiments and contributed data towards manuscript. Alan Lam, Allen Chen- Participated in designing and planning the study and provided technical advise. Yui-Han Loh, Shaul Reuveny and Steve Oh - Conceived ideas for the study and participated in its design, as well as critical manuscript revision.
